# Supplementary material for: Radiation Immunodynamics: Longitudinal Cytokine Levels During Radiotherapy in Glioblastoma Predict Survival
Source: Research Square preprint supplement (doi:10.21203/rs.3.rs-8118956/v1), 2025-12-01

**Figure S1:** 14 cytokines at baseline and during longitudinal measurements that are not prognostic of OS. a) Box plot comparing the baseline cytokine levels between control (left), non-survivors (<2 years, center), and survivors (>2 years, right). Top row (left to right): BTLA, G-CSF, GM-CSF, second row: IFNϒ, IL-1β, IL-2, third row IL-4, IL-6, IL-8: fourth row: IL-12p40, IL-12p70, sCD14, bottom row: TNFα, TGF-β1 (left to right) b) dynamic changes in the above cytokines during the 6-week course of radiation treatment.

**Fig S1a**


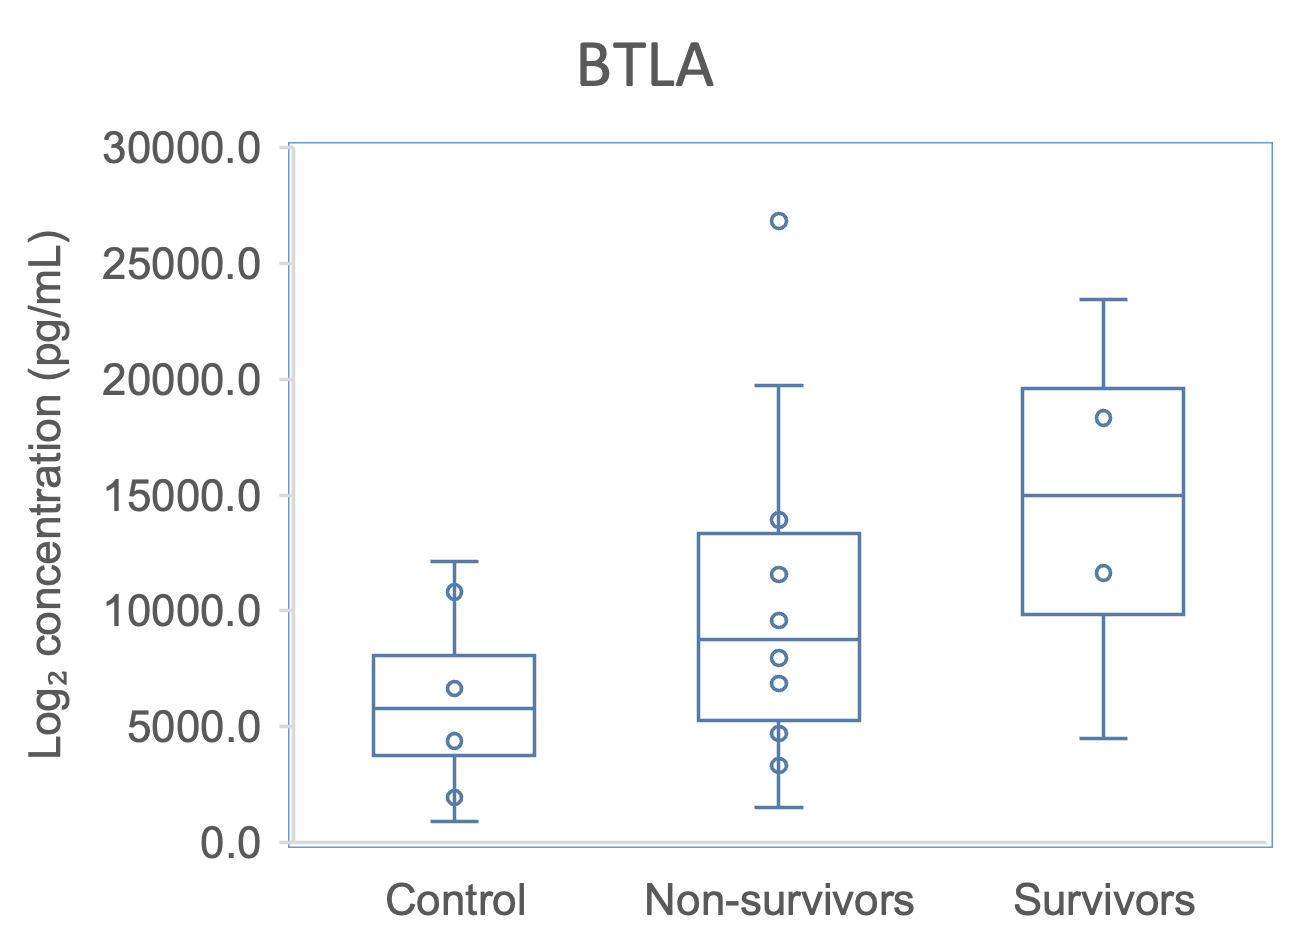

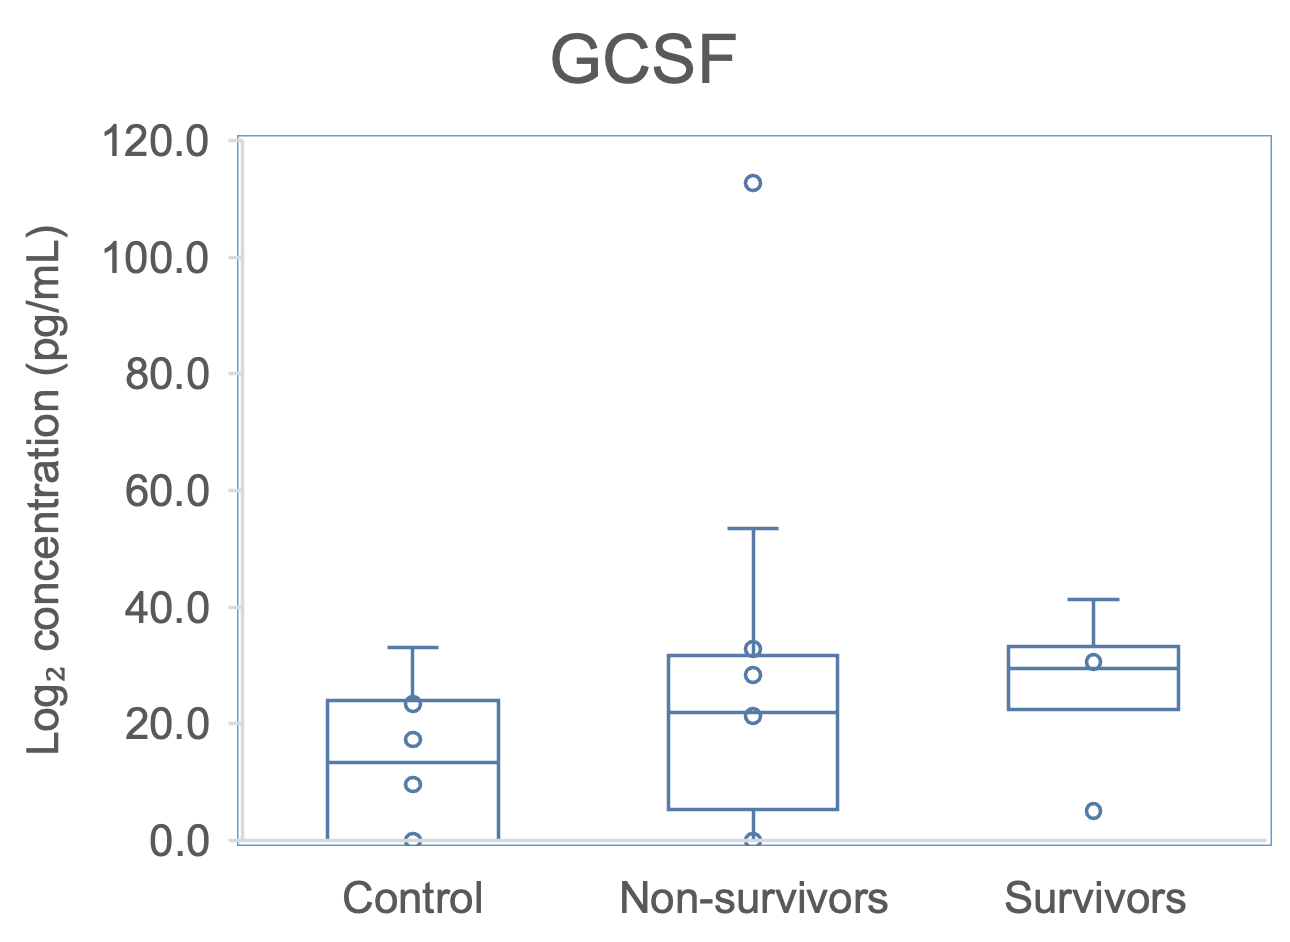

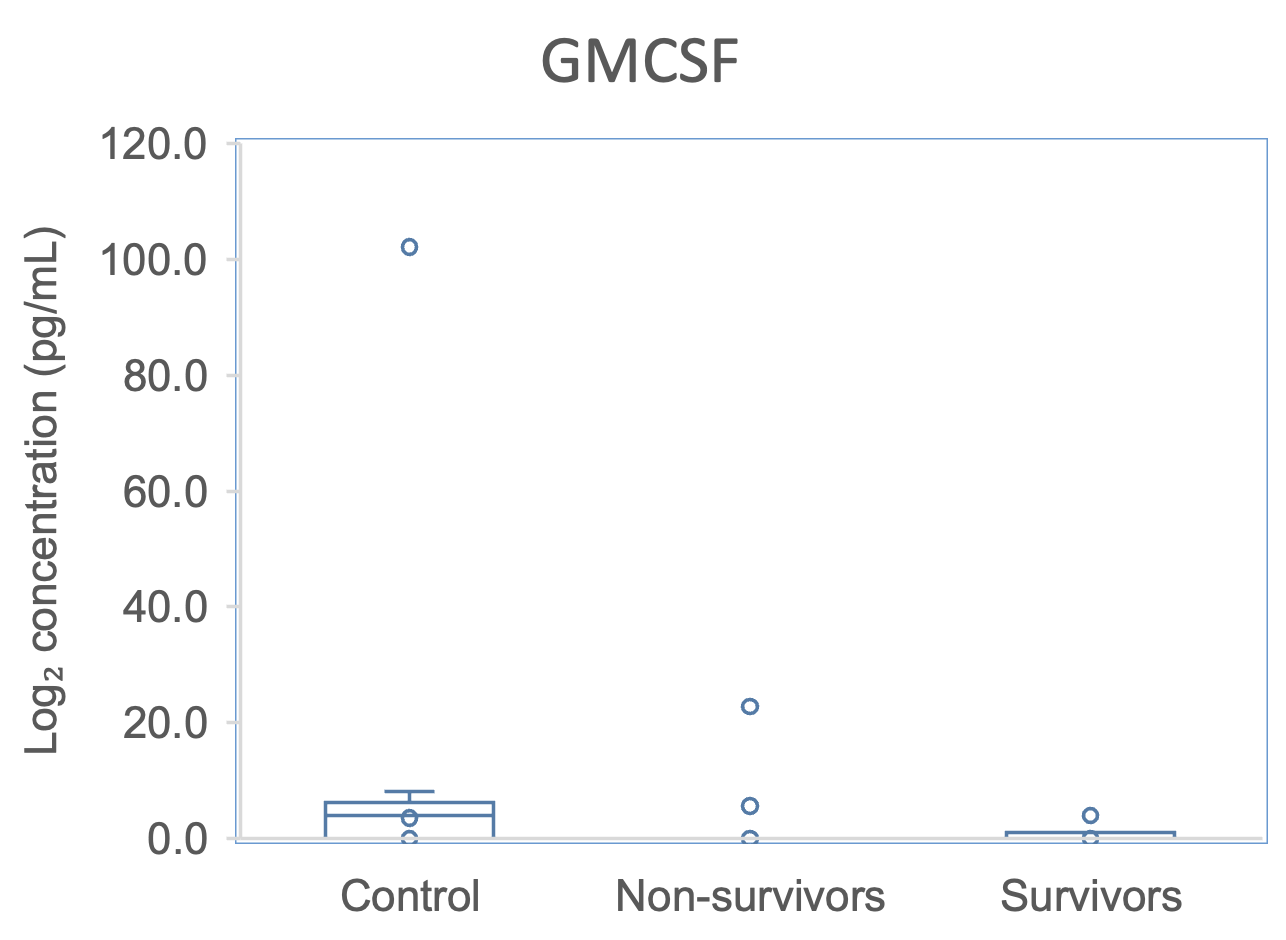

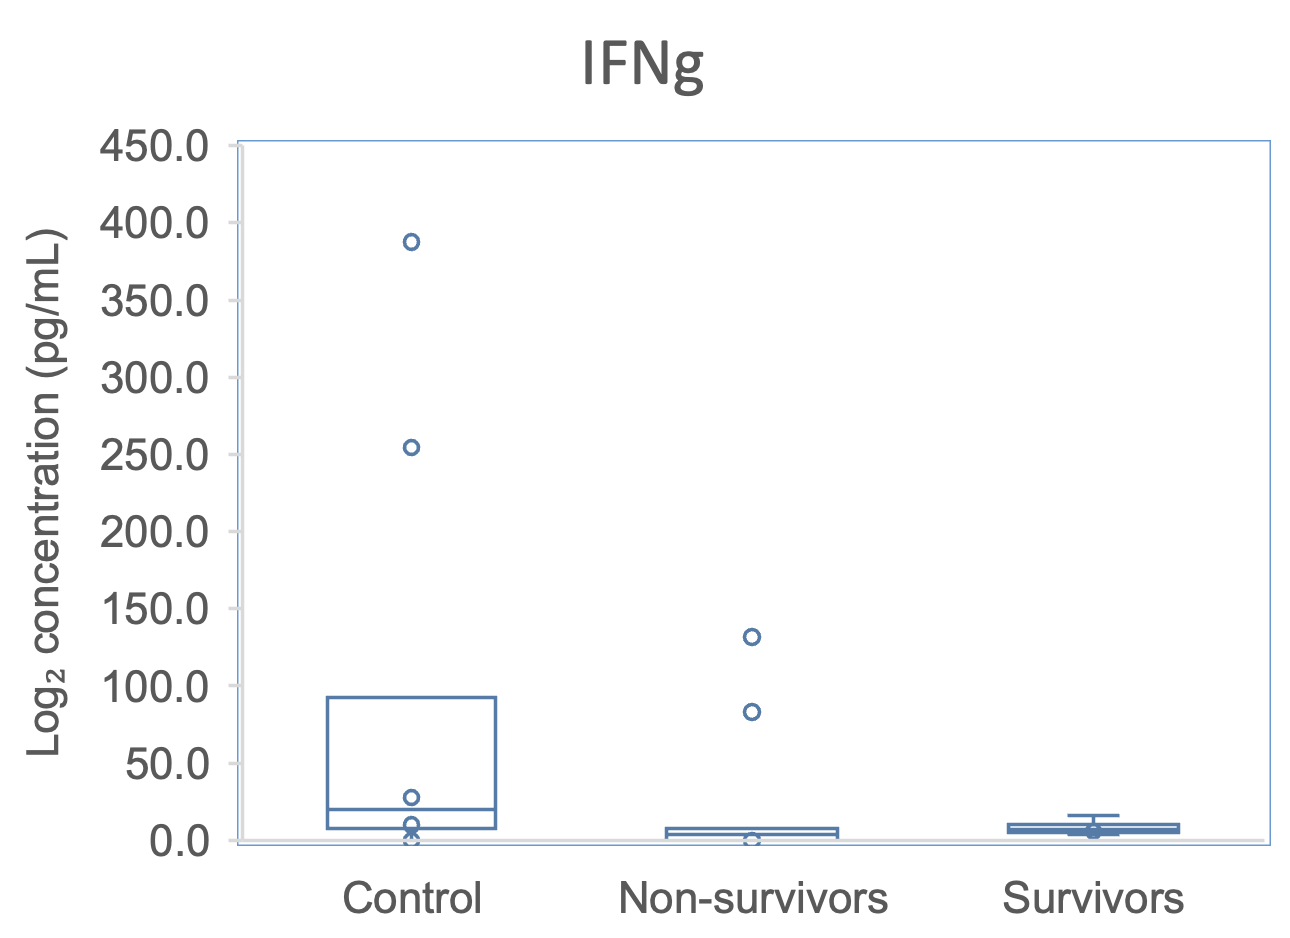

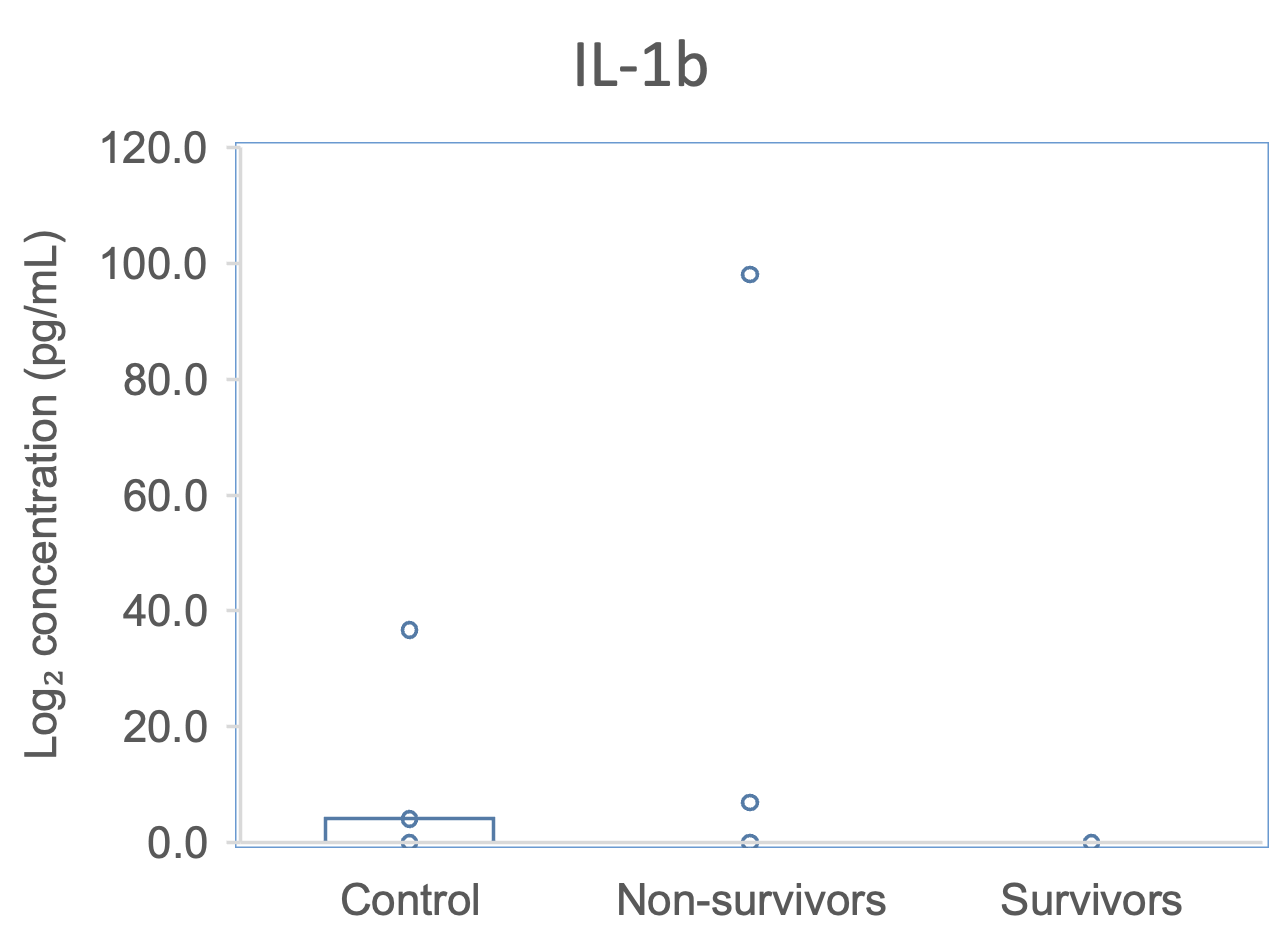

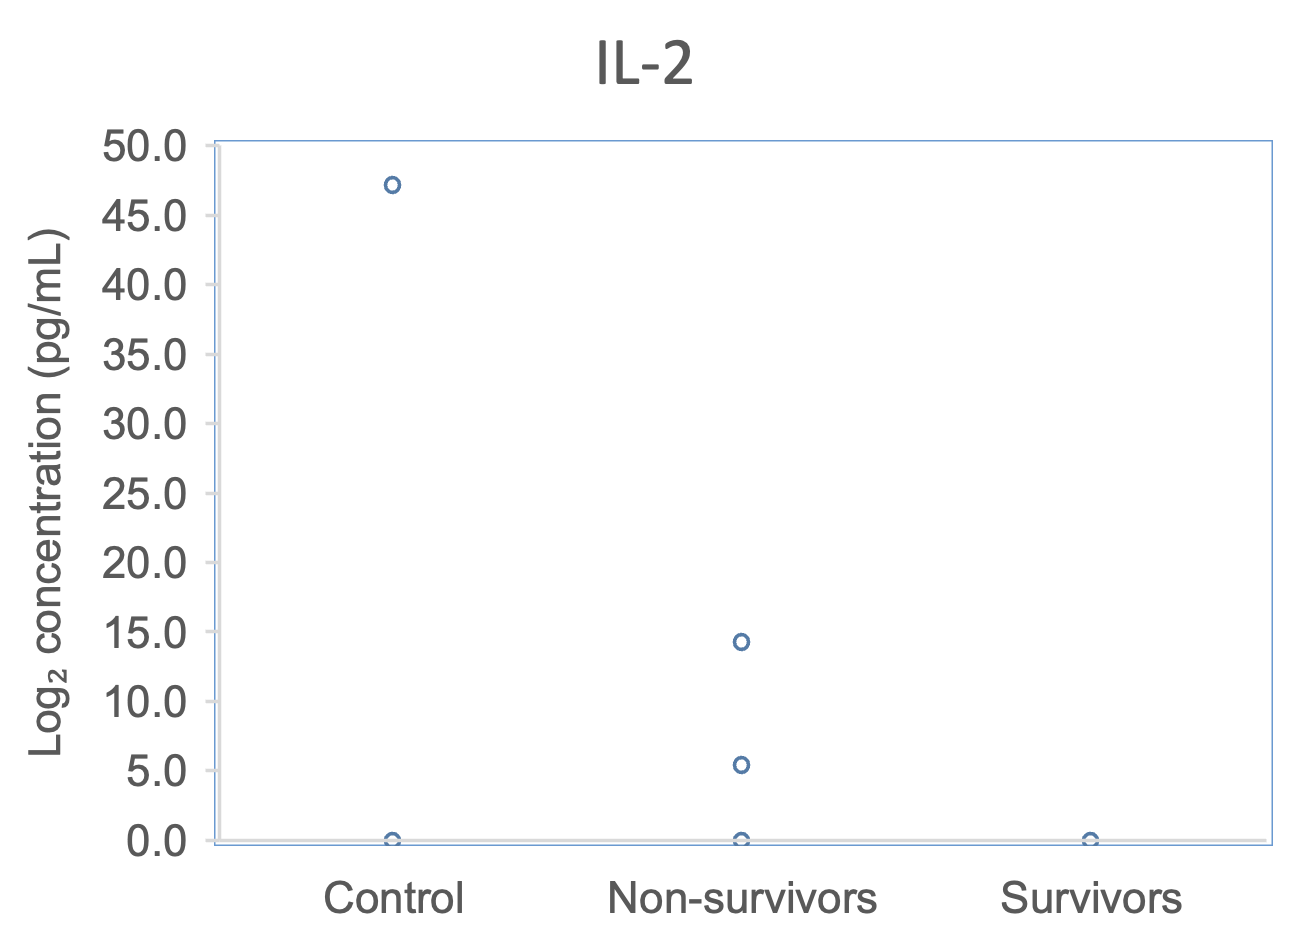

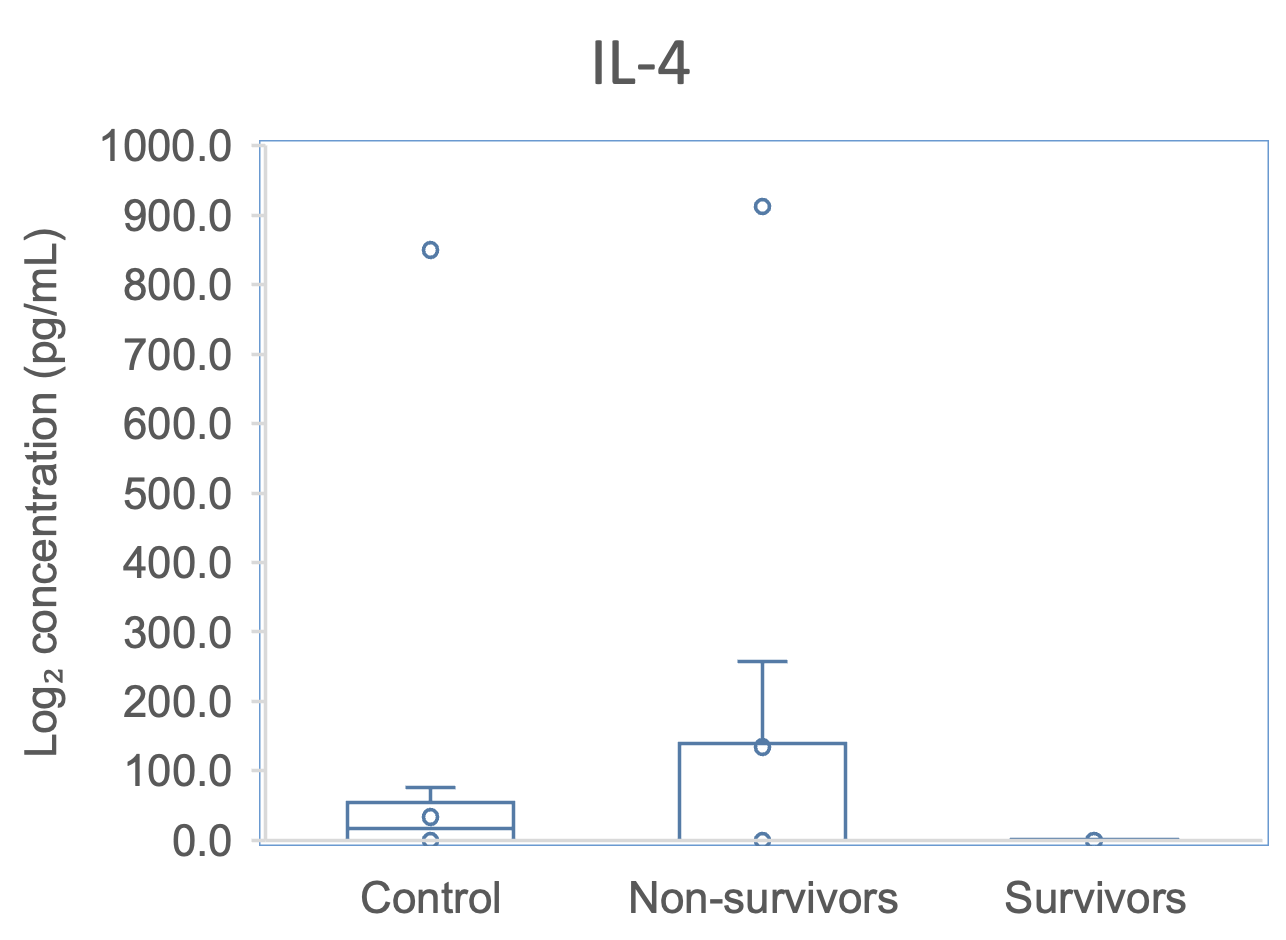

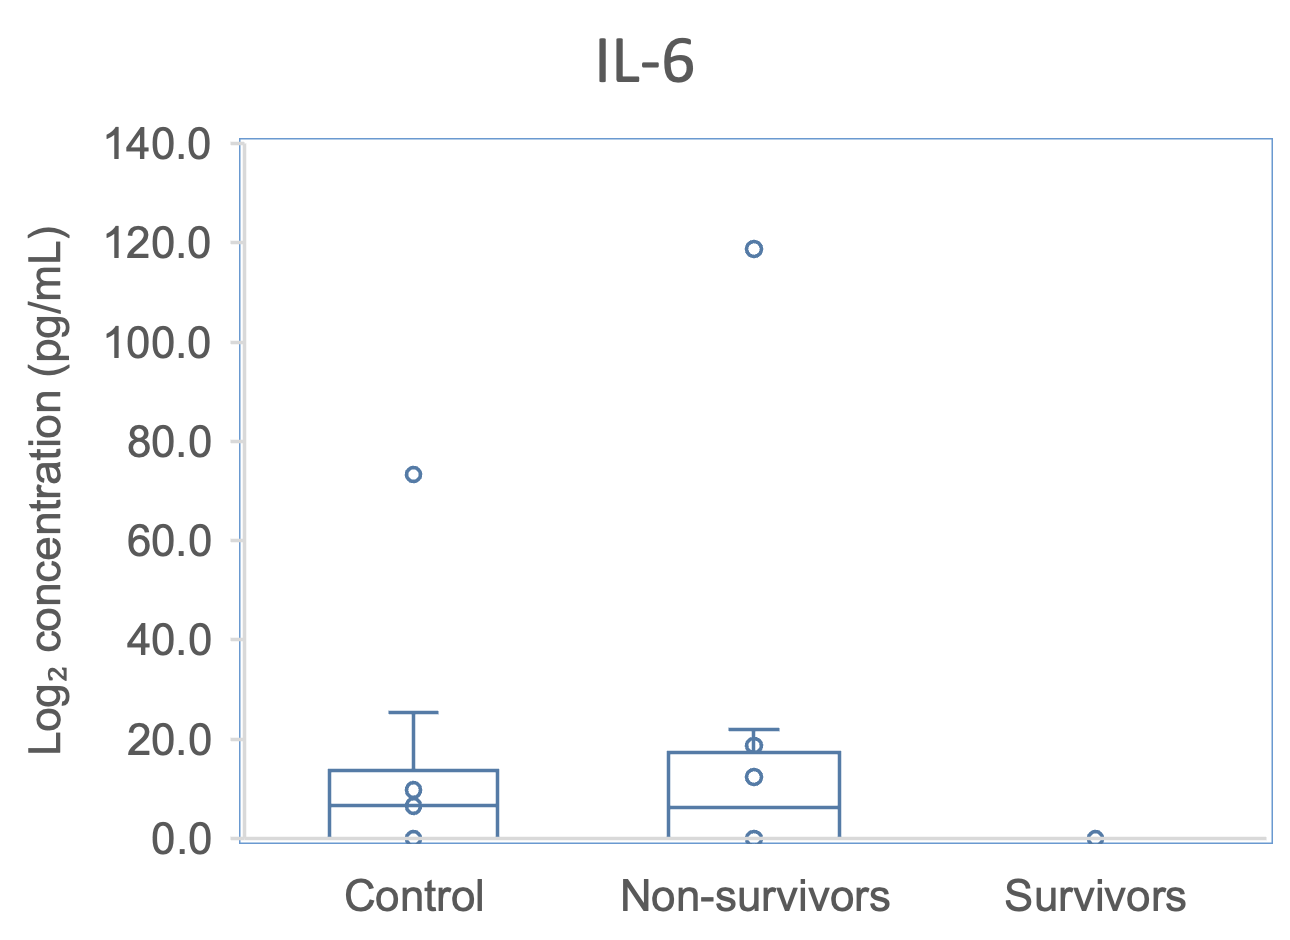

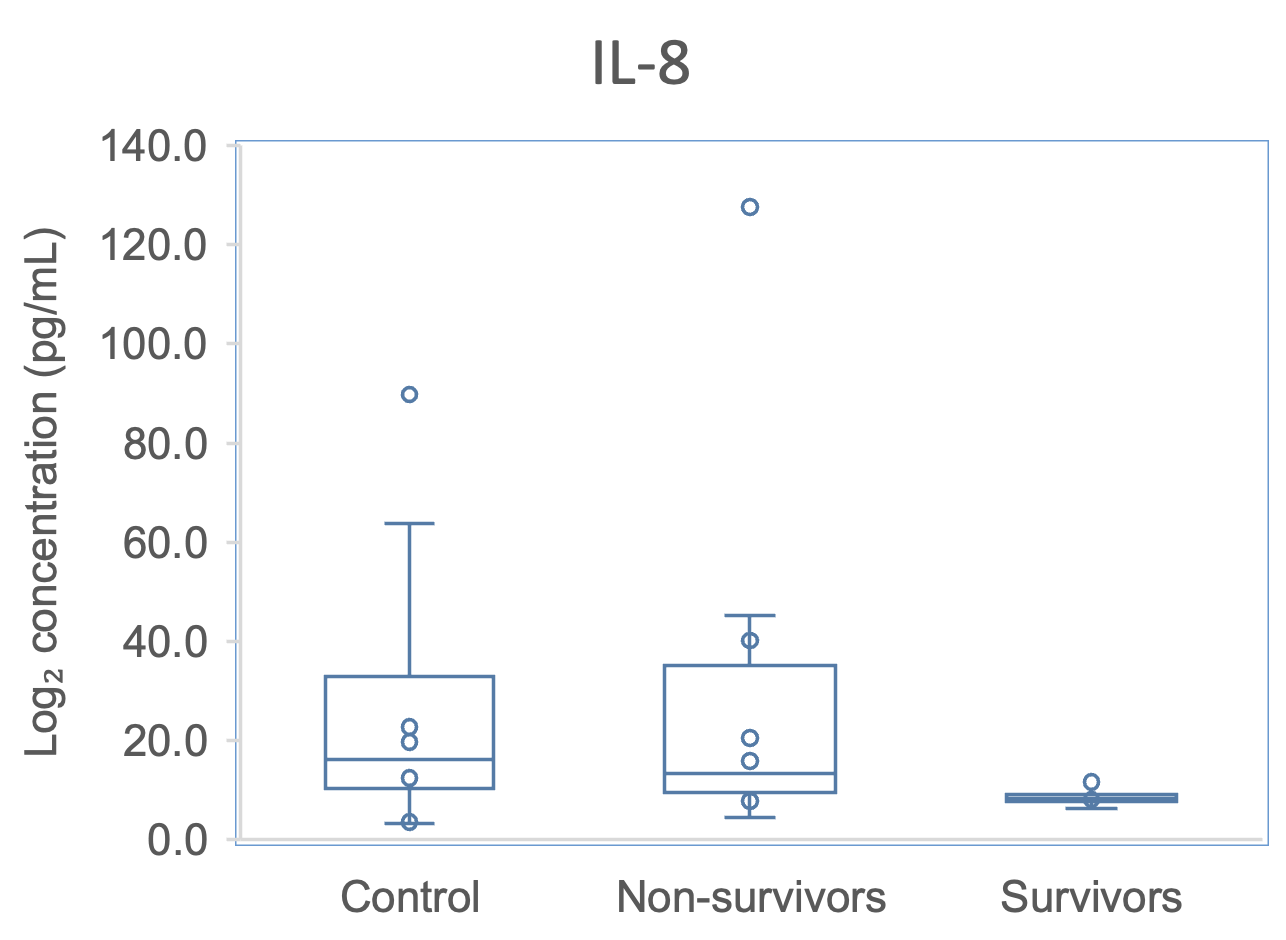

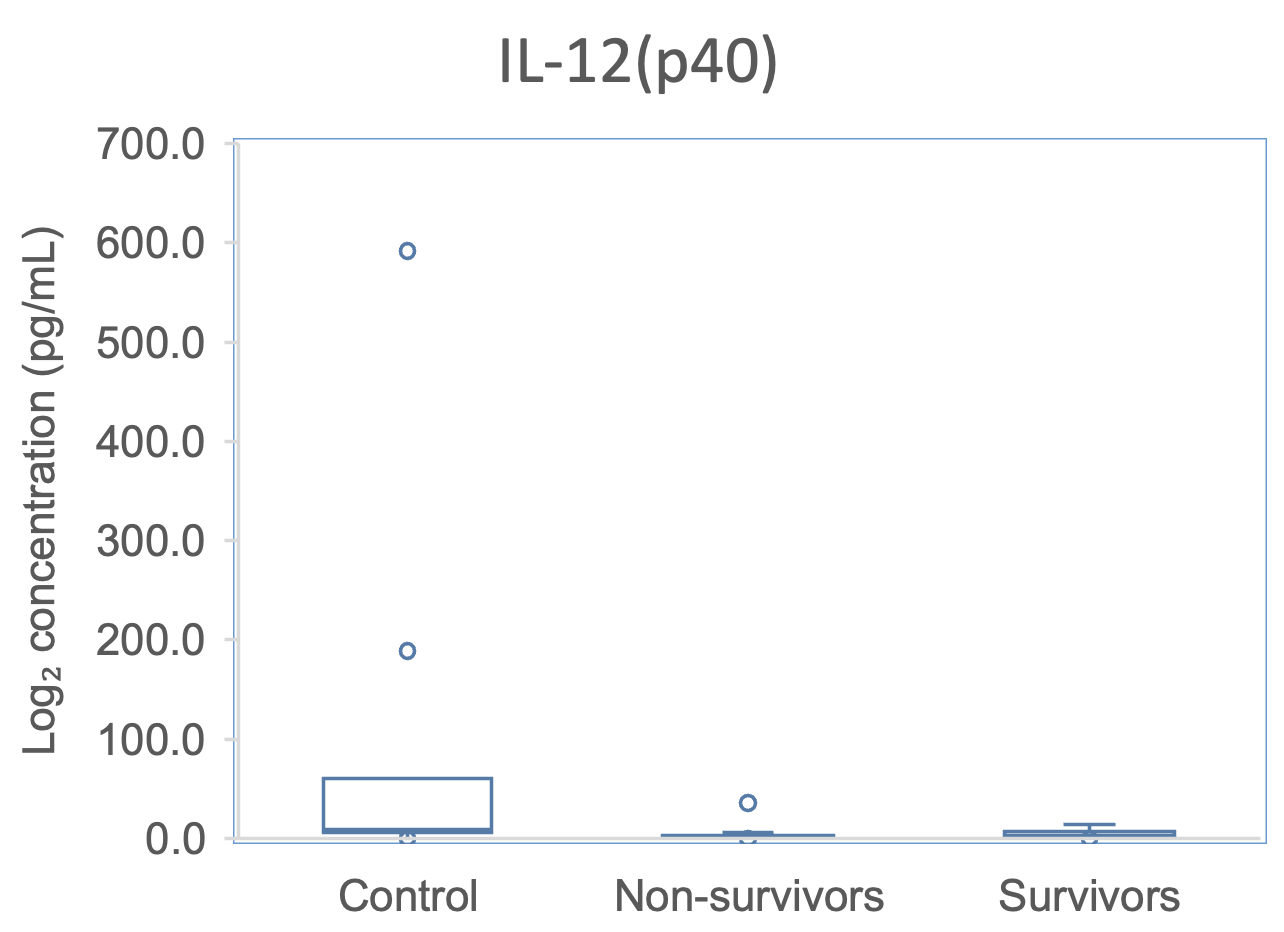

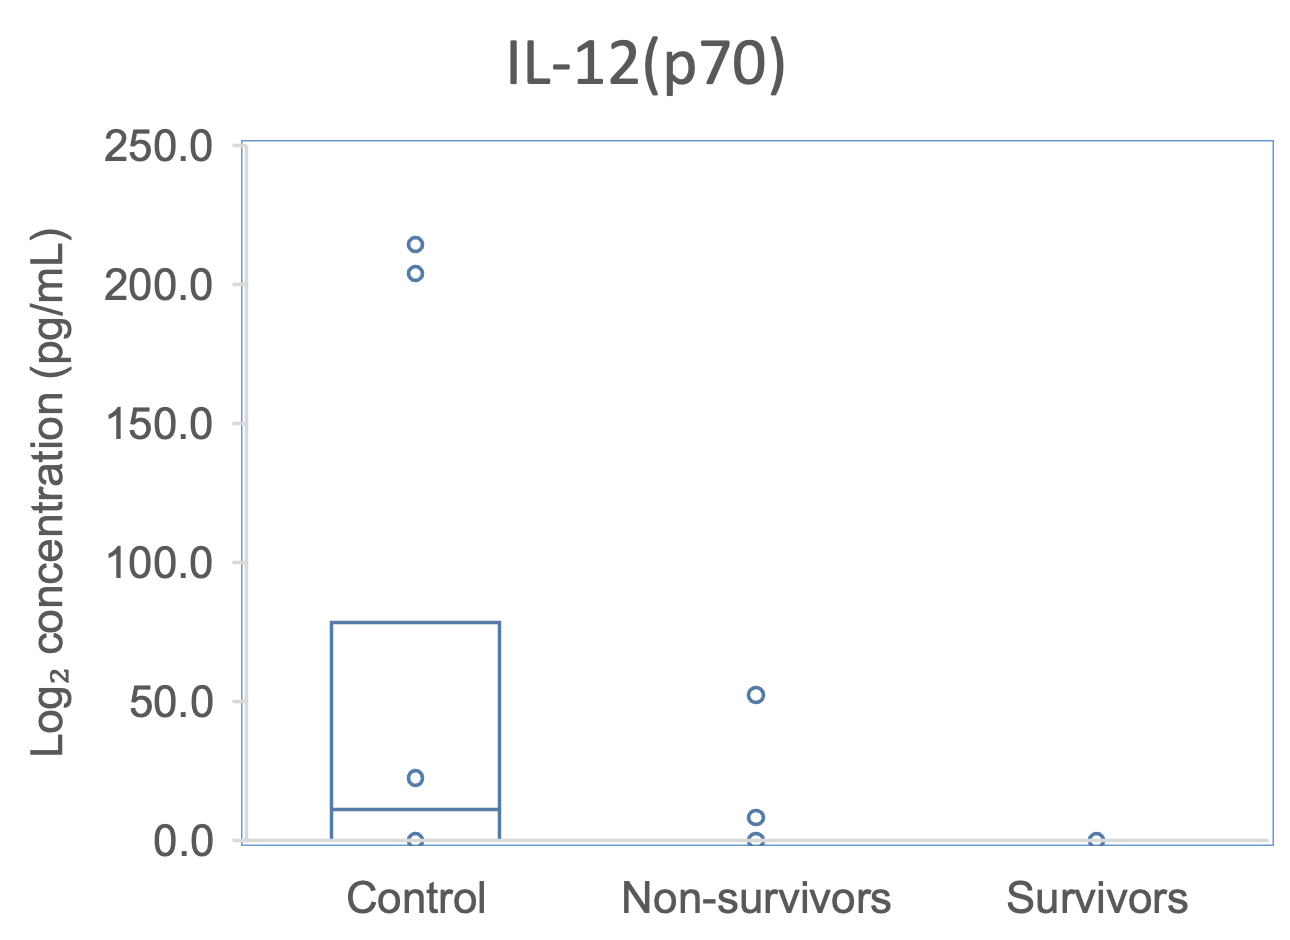

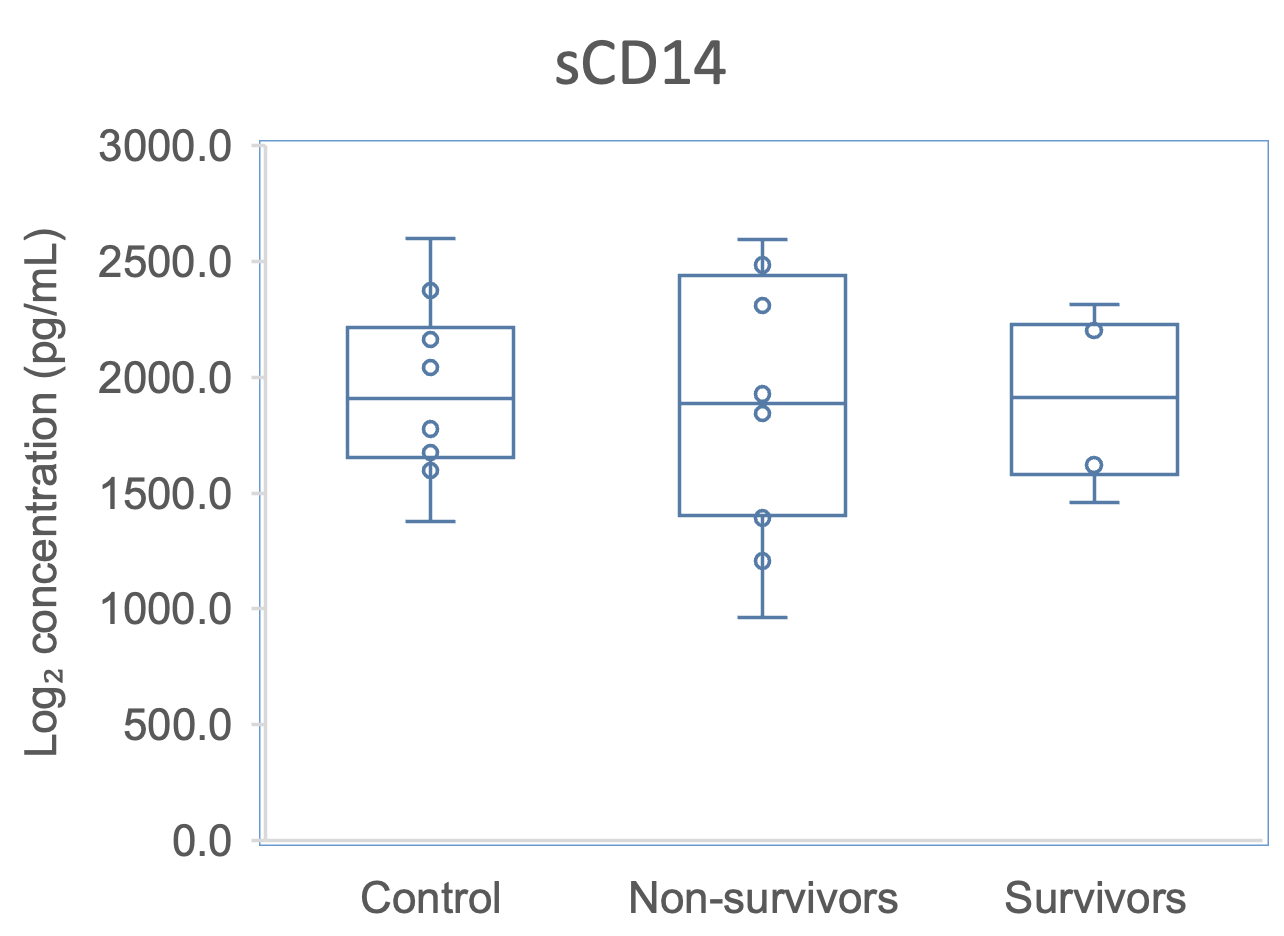

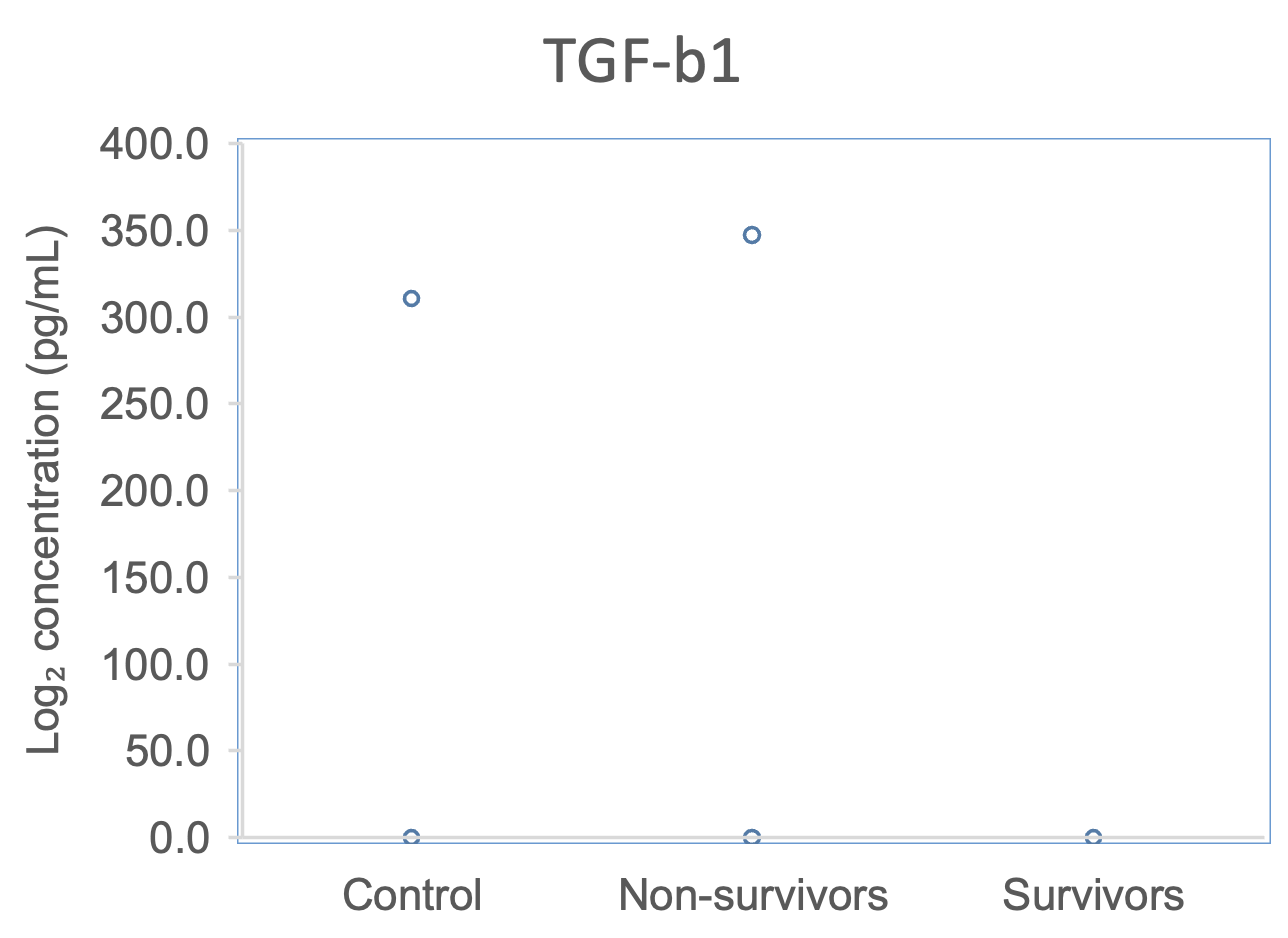

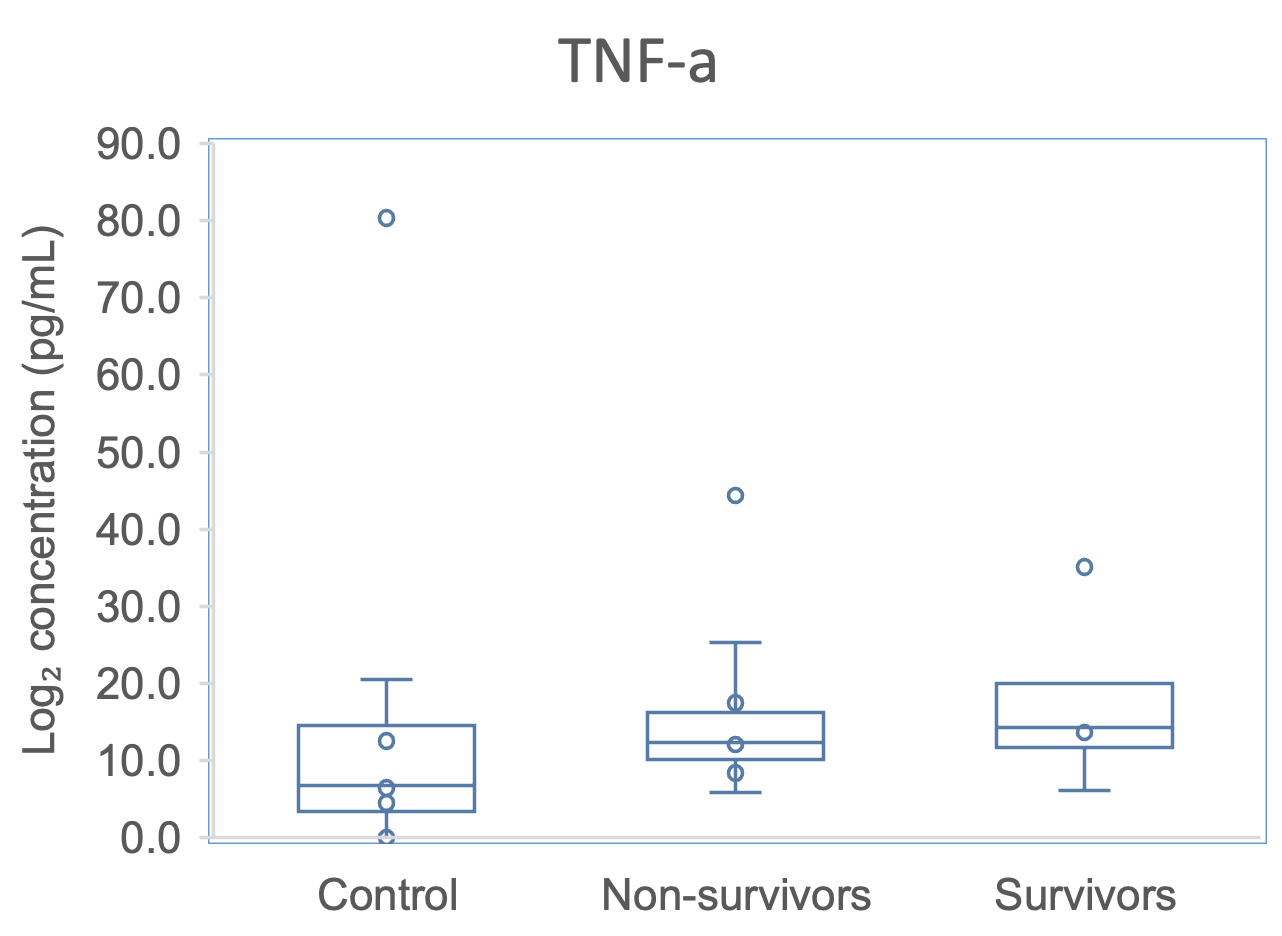


**Fig. S1b**


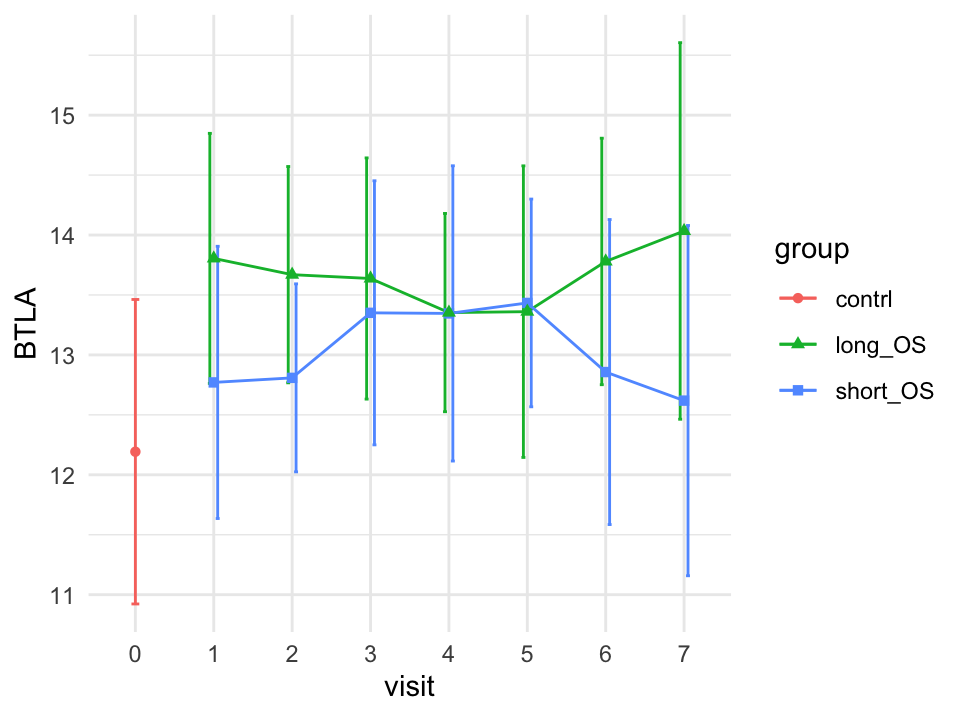

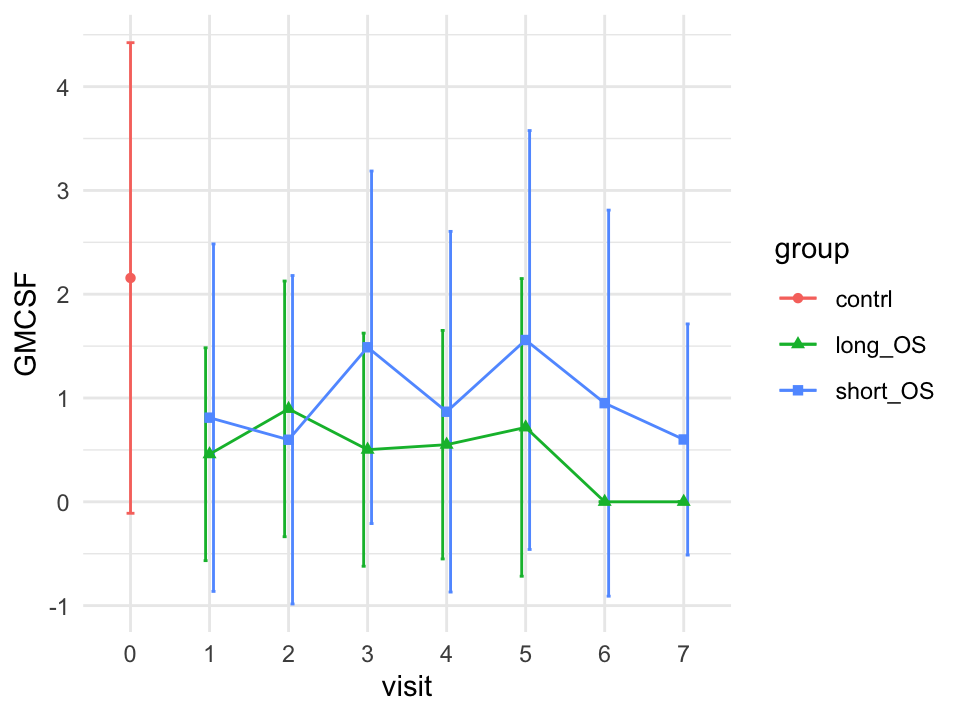

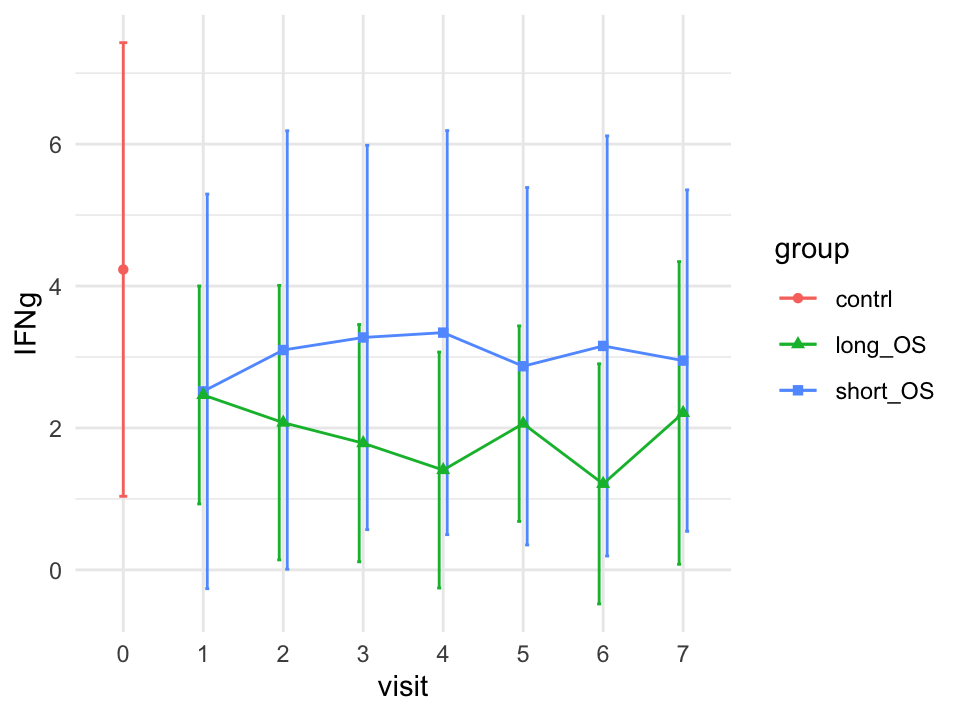

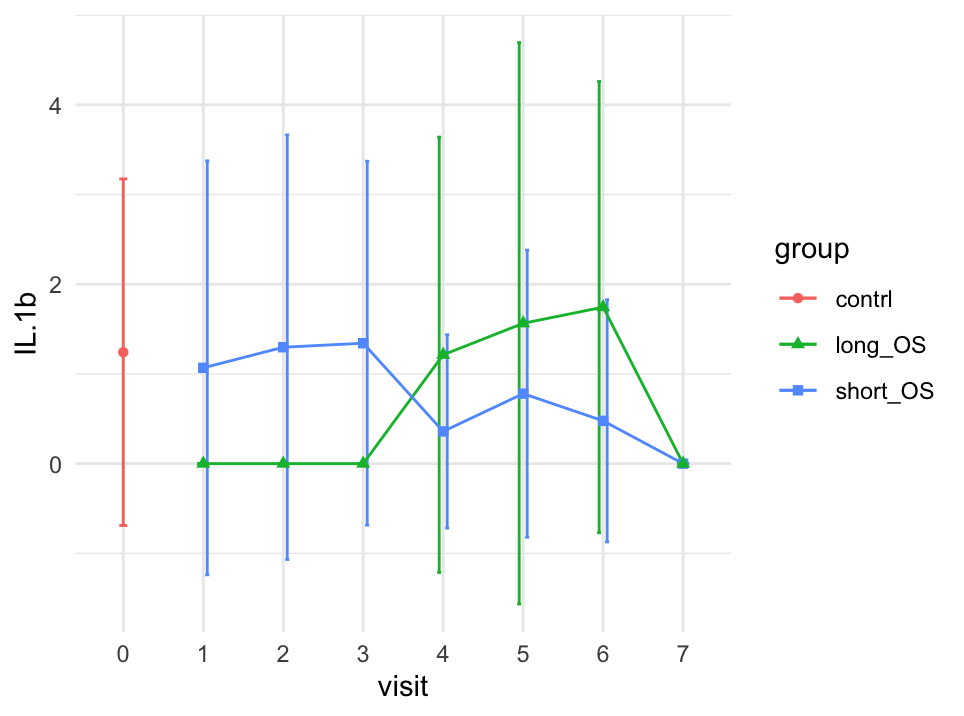

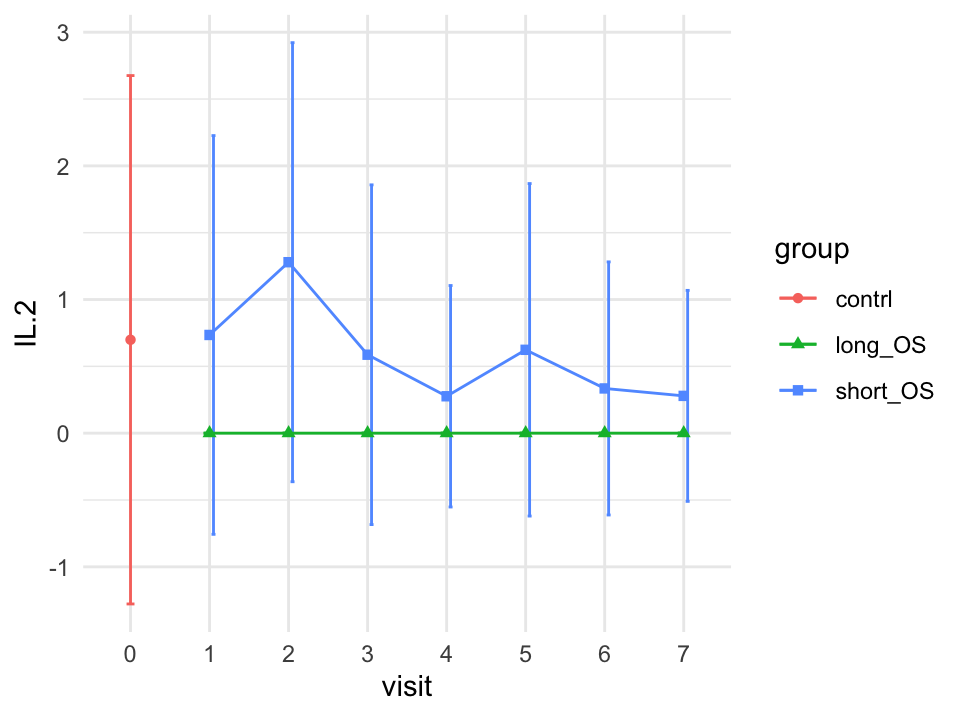

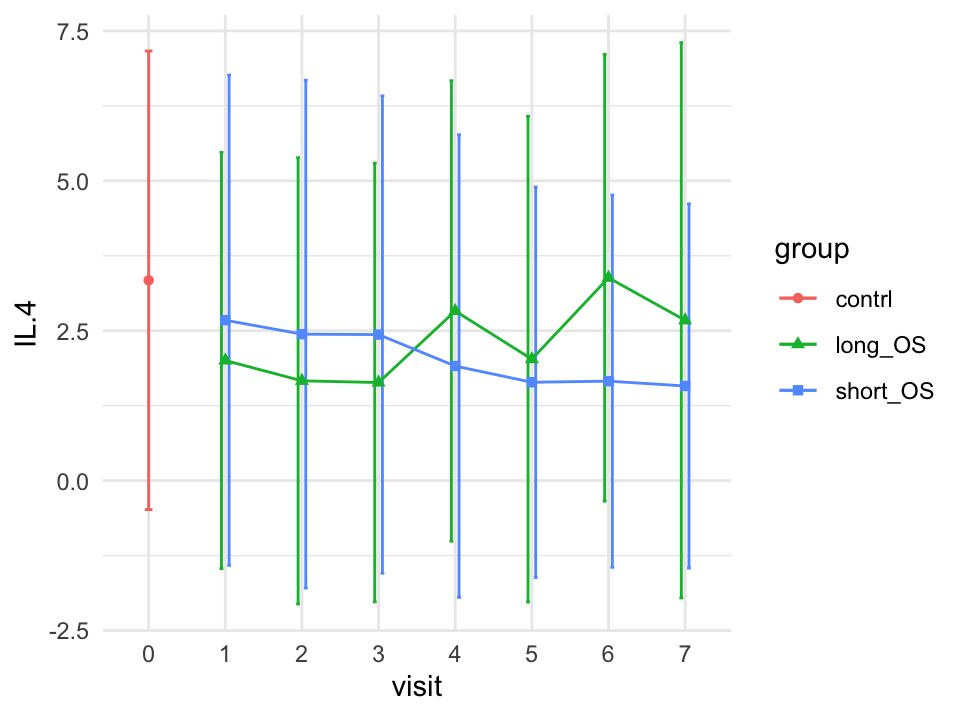

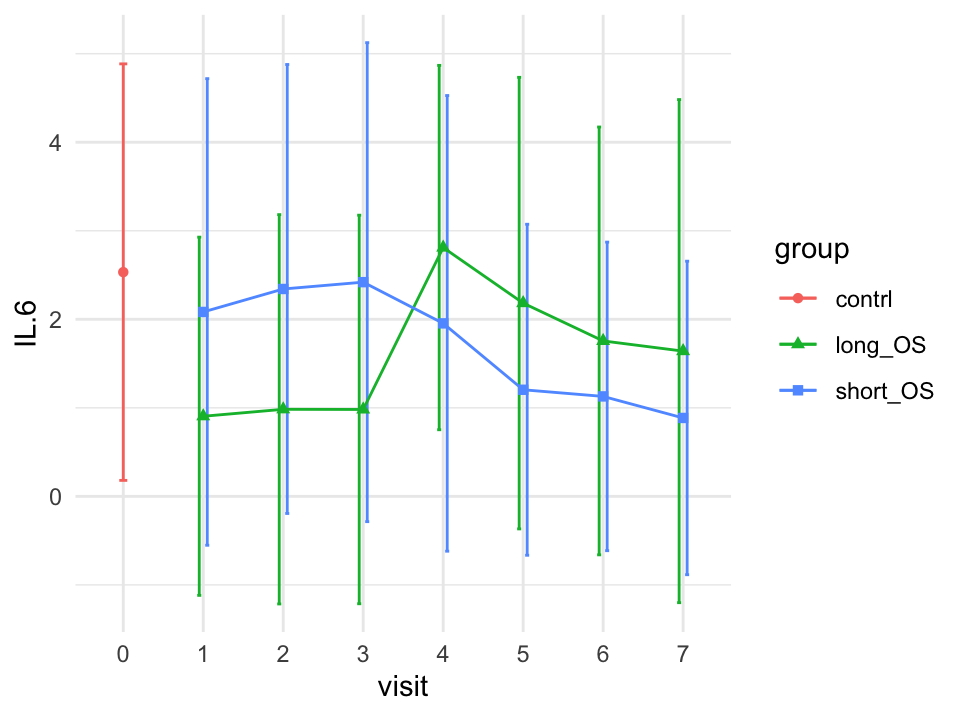

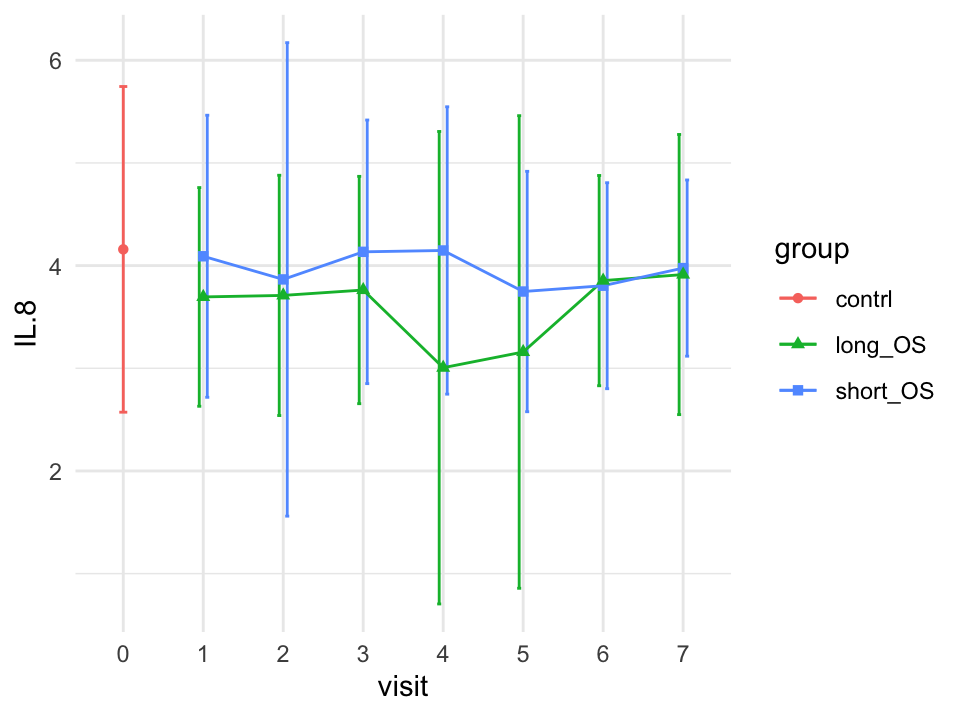

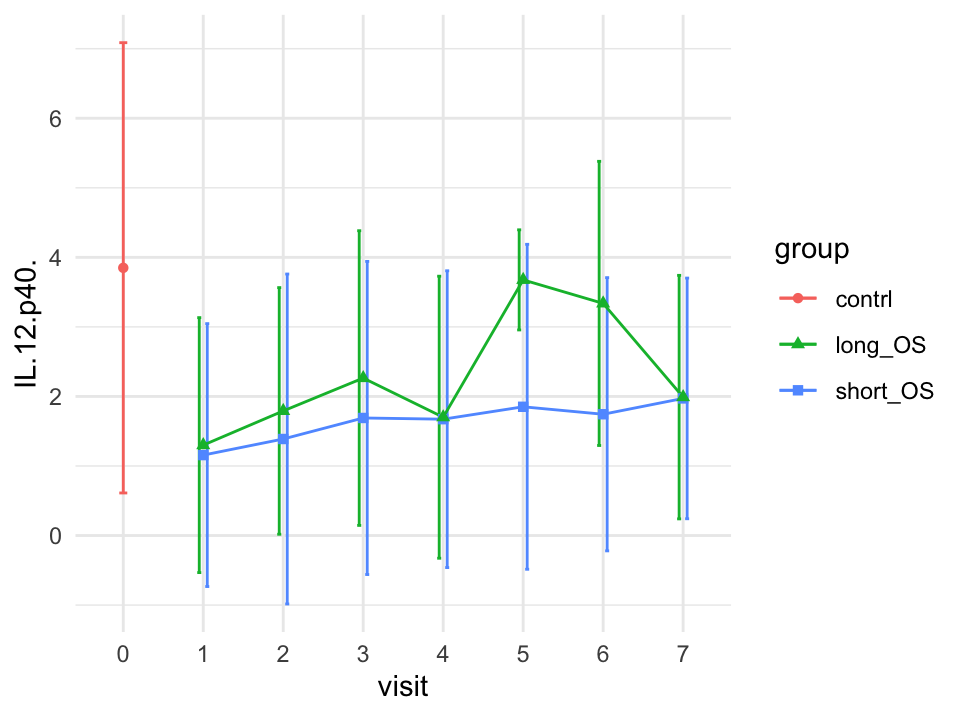

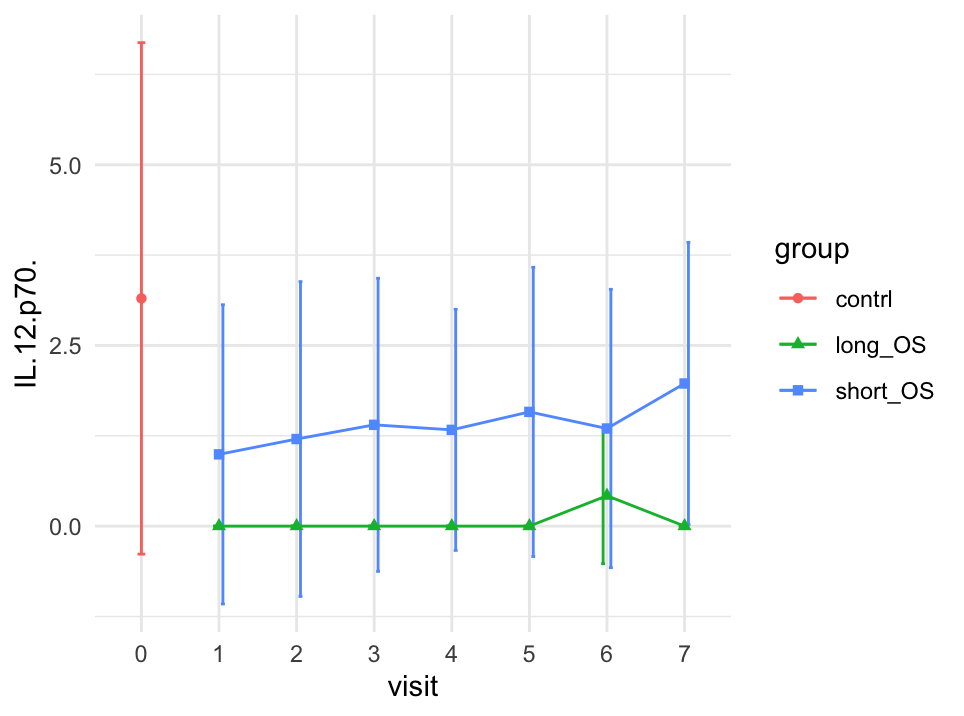

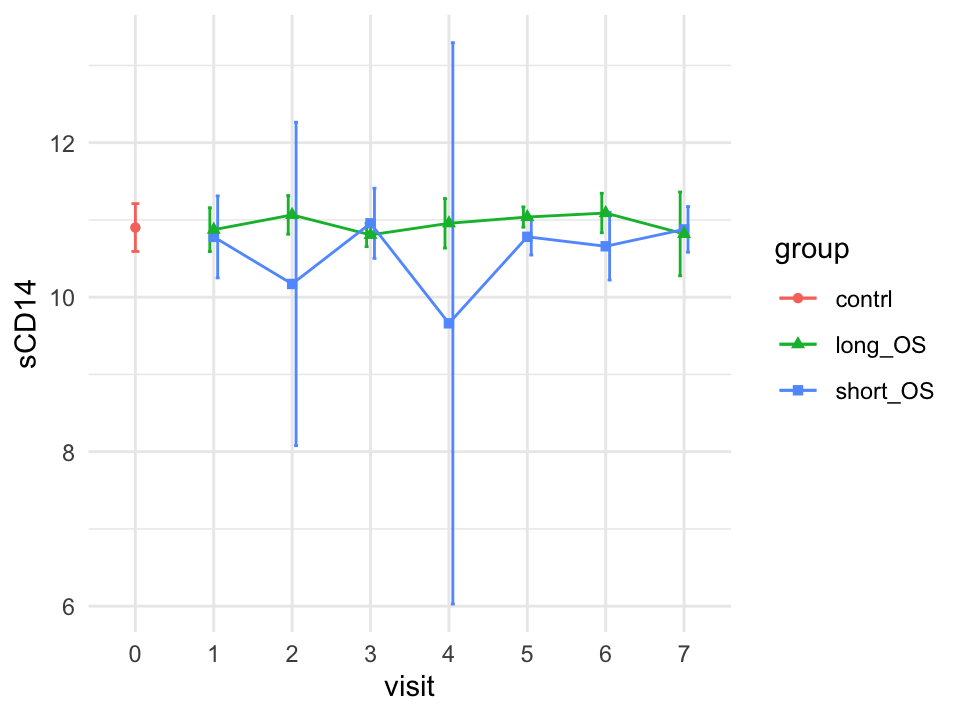

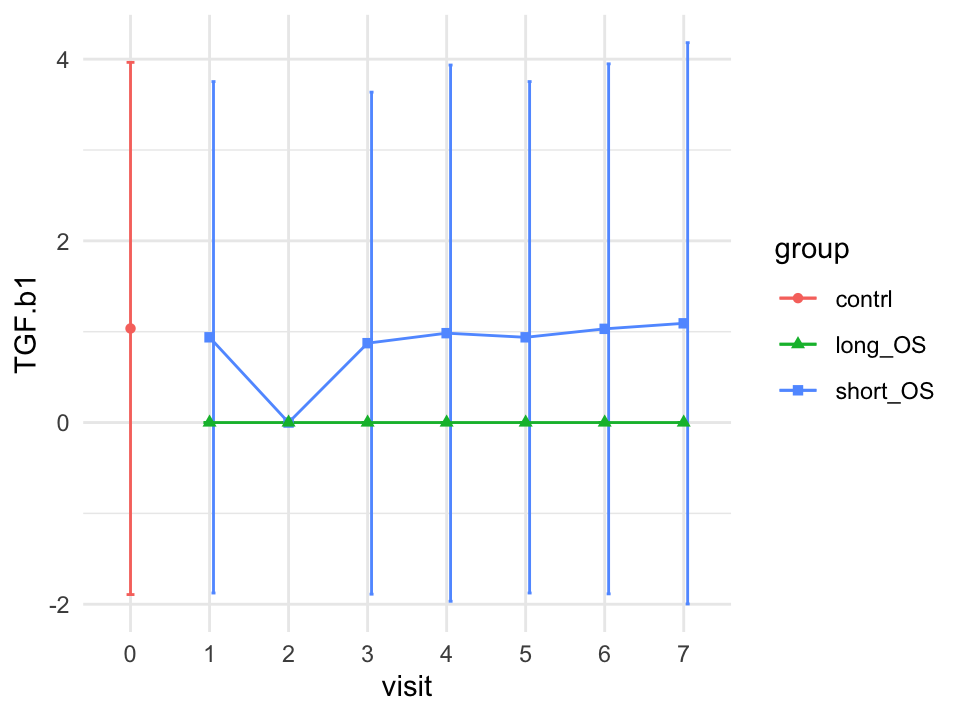

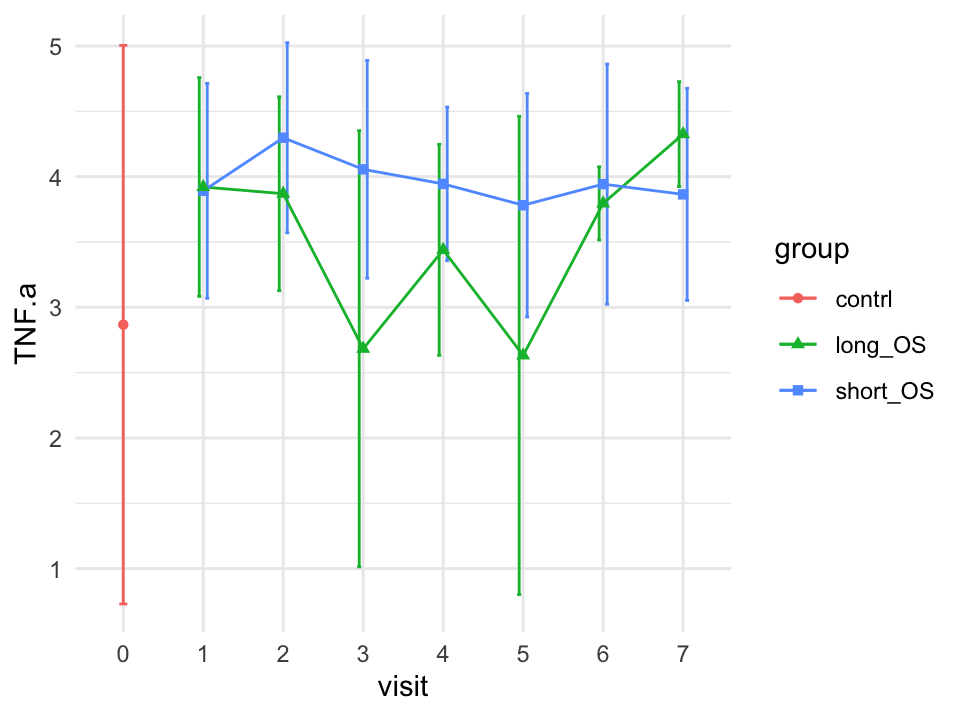

Supplement: Supplementary file 1 [file 33857007232f7e6729958463.docx]
